# Supplementary material for: Biomimetic preparation of trace element-codoped calcium phosphate for promoting osteoporotic bone defect repair
Source: Royal Society of Chemistry journal article supplement (doi:10.1039/c2tb00138a), 2013-01-01
Supplement: c2tb00138a.pdf [file c2tb00138a.pdf]

## Supplementary Materials

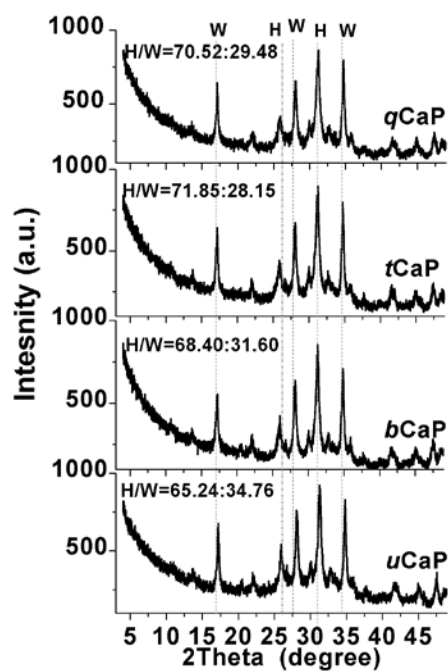

**Figure S1.** XRD patterns of the trace element-codoped CaP obtained from the teSBF in the presence of 20  $\mu\text{M}$  PAsp after ageing for 240 min. The H/W ratio indicates the hydroxyapatite/whitlockite ratio in the powders according to the Rietveld refinement analysis. H: hydroxyapatite; W: whitlockite.

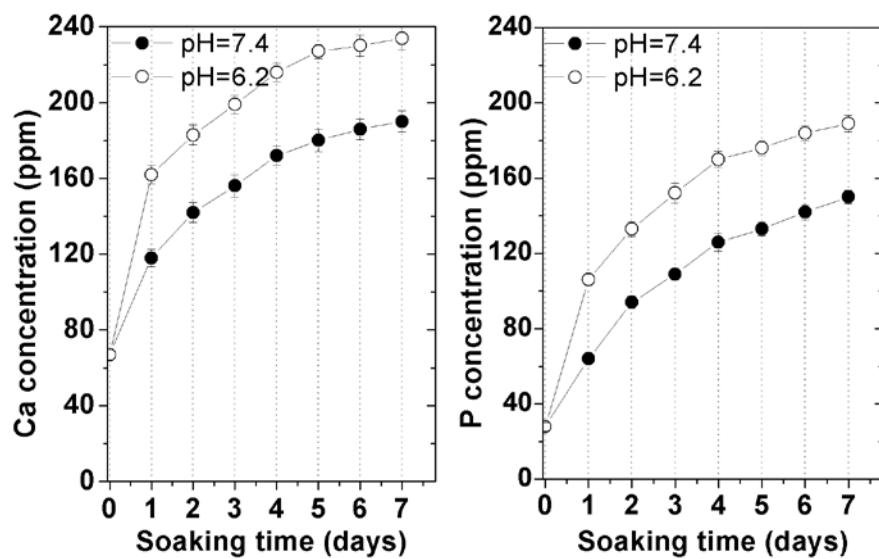

**Figure S2.** The Ca and P concentration measurement by ICP analysis of DMEM media (with different initial pH) during immersing *q*CaP powders for various time stages.

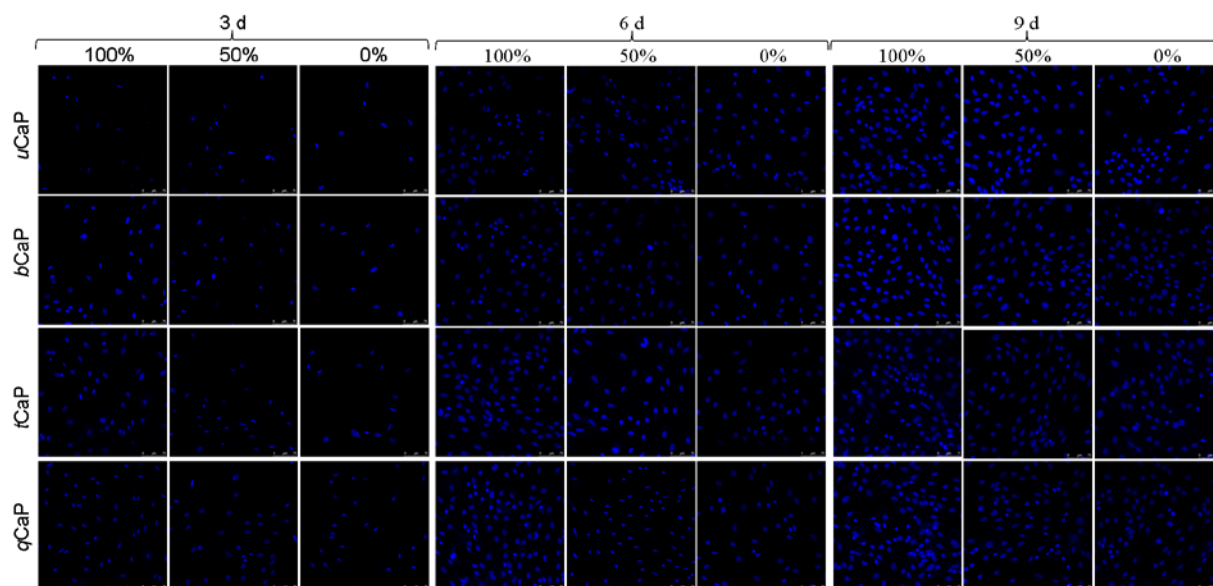

**Figure S3.** Effect of ionic extraction of different CaPs on rOMSC activity. DAPI staining were assessed after 3 d, 6 d, and 9 d. Cell numbers in all groups increased steadily with culture time and the *qCaP* group showed the most of cell quantity at each time point.
